# Supplementary material
Source: PubMed Central journal article supplement (PMC7931771)

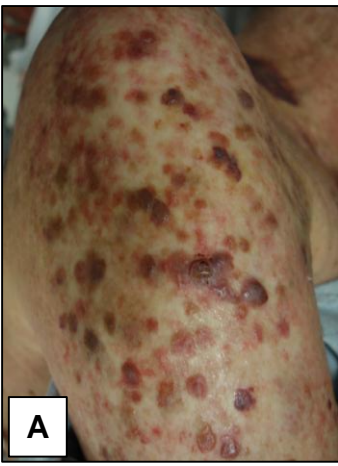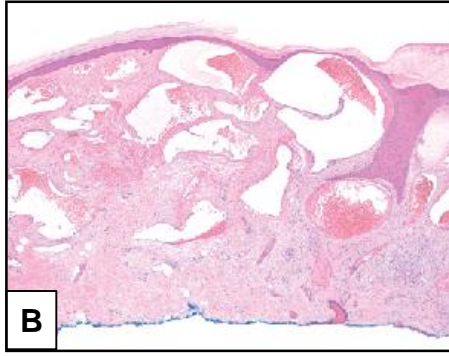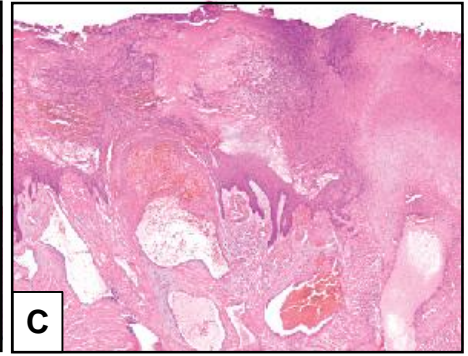

**Supplemental Figure 1**

Supplement: NIHMS1660465-supplement-2.pdf [file NIHMS1660465-supplement-2.pdf]
